# Supplementary material for: Electrochemical and X-ray structural evidence of multiple molybdenum precursor candidates from a reported non-aqueous electrodeposition of molybdenum disulfide
Source: Royal Society of Chemistry journal article supplement (doi:10.1039/d3ra04605b), 2023-01-01
Supplement: d3ra04605b1.pdf [file d3ra04605b1.pdf]

Supporting Information

**Electrochemical and X-Ray Structural Evidence of Multiple Molybdenum Precursor Candidates from a Previously Reported Non-Aqueous Electrodeposition of Molybdenum Disulfide**

Tanner A. George,\* Jason D. Masuda,\* Christa Brosseau\*

*Department of Chemistry, Saint Mary's University, Halifax, Nova Scotia, Canada B3H 3C3.*

## Contents

|                                                                          |    |
|--------------------------------------------------------------------------|----|
| Ionic Liquid.....                                                        | 3  |
| Synthesis of PP13-Br cation precursor.....                               | 3  |
| First Synthesis of PP13-TFSI.....                                        | 3  |
| Second Synthesis of PP13-TFSI.....                                       | 4  |
| Third Synthesis of PP13-TFSI.....                                        | 4  |
| Fourth Synthesis of PP13-TFSI.....                                       | 4  |
| NMR Spectroscopy of Ionic Liquid, Precursors, and 1,4-Butanedithiol..... | 5  |
| Molybdenum Precursor.....                                                | 9  |
| Synthesis Details.....                                                   | 9  |
| First synthesis of the Molybdenum Precursor – A1.....                    | 9  |
| Second Synthesis of the Molybdenum Precursor – A2.....                   | 10 |
| Fourth Synthesis of the Molybdenum Precursor – A4.....                   | 10 |
| Seventh Synthesis of the Molybdenum Precursor – A7.....                  | 11 |
| Eighth Synthesis of the Molybdenum Precursor – A8.....                   | 11 |
| Crystallography.....                                                     | 13 |
| Ratio of Molybdenum and Oxygen.....                                      | 17 |
| Electrochemistry, Electrodeposition, and SEM Analysis.....               | 18 |

## Ionic Liquid

To prepare the ionic liquid solvent PP13-TFSI, Li-TFSI was used as the anion (TFSI<sup>-</sup>) precursor while the cation precursor PP13-Br was prepared synthetically from N-methyl piperidine and 1-bromopropane via a modified literature procedure.<sup>1</sup> Briefly, the cation precursors were heated in acetonitrile for a prolonged period, with PP13-Br precipitating as a white solid in the golden liquid upon cooling. Combining PP13-Br and Li-TFSI as aqueous solutions causes precipitation of a dense (> 1 g/mL), mildly viscous colourless liquid within an hour of mixing, and extraction with dichloromethane (DCM), washing with ultrapure water, and drying *in vacuo* results in the PP13-TFSI ionic liquid used for electrochemical experiments (Scheme S1).<sup>1</sup>

Scheme S1 Synthesis of cation precursor PP13-Br and the ionic liquid PP13-TFSI from metathesis with Li-TFSI.

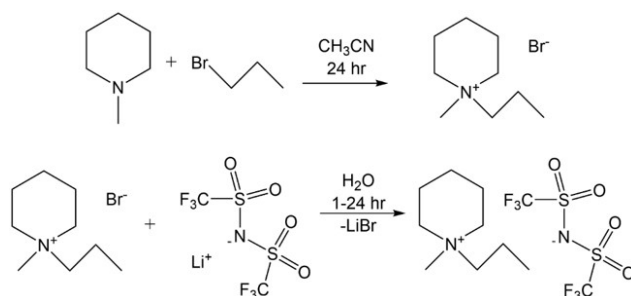

### Synthesis of PP13-Br cation precursor

In a 500 mL round bottom flask 15 mL 1-bromo propane, 20 mL N-methyl piperidine and 160 mL acetonitrile were heated to 70 °C for 2.5 hours with an air condenser open to air until solid began forming, then nitrogen was supplied for the remainder of the synthesis. At the 4-hour mark, aluminum foil was wrapped around the flask. The next day at the 23-hour mark, the solid had prevented stirring. This was filtered through a coarse glass frit and rinsed with 50 mL acetonitrile in 4 aliquots, transferred to a round bottom flask and dried at 42 °C under vacuum. A second crop was harvested by concentrating the solution until solid formed, followed by cooling to 0 °C and filtering/rinsing as before. The third crop of crystals came from completely drying the filtrate to a yellow paste, triturating with 10 mL acetonitrile, then filtering and rinsing. The filtrate was disposed of, and the yield for each crop was 16.2, 8.2, and 4.9 g (44, 22, 13 % yield, total 79%) in succession after drying *in vacuo*. By <sup>1</sup>H NMR, each crop was pure PP13-Br with a trace of acetonitrile or water.

### First Synthesis of PP13-TFSI

A solution of PP13-Br (0.9566 g) in 6 mL D.I. H<sub>2</sub>O was slowly added to a solution of Li-TFSI (1.2362 g) in 6 mL D.I. H<sub>2</sub>O with rapid stirring. And additional 2×2 mL D.I. H<sub>2</sub>O was used to completely transfer the PP13-Br solution and left to stir over night. Upon initial addition, the solution of Li-TFSI

became cloudy and translucent. Ceasing stirring allowed a biphasic layer to form with PP13-TFSI on the bottom with an aqueous top layer, which was decanted off. Rinsing the bottom layer with 3×5 mL D.I. H<sub>2</sub>O with ~10 min stirring, settling, and decanting each time was followed by dissolution of PP13-TFSI in 6 mL DCM which was similarly rinsed with 3×5 mL D.I. H<sub>2</sub>O. The next day, the organic layer was dried over MgSO<sub>4</sub> and filtered through a diatomaceous earth pipette filter, rinsing 2× with ~3 mL MgSO<sub>4</sub> dried DCM. The final solution was dried *in vacuo* at 105 °C for 14 hours and the ionic liquid was pure by NMR, however when water was present, a shift was noticed clearly by <sup>1</sup>H NMR spectroscopy for the two -CH<sub>3</sub> groups with the shifted peaks disappearing with water loss. This indicates a strong interaction such as some sort of clustering or hydrogen bonding occurring between the ionic liquid and water.

#### **Second Synthesis of PP13-TFSI**

A solution of 5.4601 g PP13-Br in 15 mL H<sub>2</sub>O was added to a solution of 7.0475g LiTFSI in 20 mL H<sub>2</sub>O within a 50 mL Erlenmeyer flask, rinsed with 3×5 mL H<sub>2</sub>O, totaling 50 mL. Stirring overnight was followed by quick settling of the layers the next day. Decanting the water was followed by addition of 15 mL CHCl<sub>3</sub> was added to extract remaining product and was separated with a pipette to the ionic liquid bottom fraction. Triplicate washing of the organic fraction with 20 mL water with stirring, settling and decanting in between was followed by drying over MgSO<sub>4</sub> for 20 minutes and filtering through diatomaceous Earth with 3×3 mL CHCl<sub>3</sub> rinses and the combined solvent was removed *in vacuo* and heated the remaining thick colorless viscous liquid was heated to o 100 °C in two separate vials. One vial was dropped in the oil bath, losing the product. The remaining vial of PP13-TFSI when dried contained 0.1 eq H<sub>2</sub>O and weighed 4.5g.

#### **Third Synthesis of PP13-TFSI**

In a 125 mL Erlenmeyer flask 9.818 g PP13-Br dissolved in 60 mL H<sub>2</sub>O had a solution of 12.665 g Li-TFSI in 20 mL H<sub>2</sub>O added followed by 20 mL used to rinse the beaker 3 times into the reaction flask. Stirring for 1.5 hours, then add 20 mL CHCl<sub>3</sub> and rapidly stir biphasic mixture for 2 minutes, followed by settling until no more visible tiny bubbles of CHCl<sub>3</sub> were suspended in the water layer. Decanting the water was followed with triplicate washing the organic layer with three 25 mL portions. The organic phase was transferred to a separatory funnel with an additional 75 mL water, the organic phase washed once more and separated, dried over MgSO<sub>4</sub> for 20 min and filtered through diatomaceous Earth with 3×5 mL CHCl<sub>3</sub> rinses and the solvent was removed *in vacuo* and heated to 105 °C for 12 hours and store in a glovebox, total mass = 13.98 g (75 % yield)

#### **Fourth Synthesis of PP13-TFSI**

Two 10 mL water solutions were prepared containing 3.9630 g Li-TFSI and 3.1253 g PP13-Br. The PP13-Br solution was then added to the Li-TFSI solution, followed by 5 mL water to rinse. After 1.5 hours the biphasic mixture was allowed to settle, the aqueous phase was decanted, and the ionic liquid was washed 2× with 5 mL water by stirring for 0.5 hours. All three aqueous decantation's were

combined. The PP13-TFSI had 2×10 mL DCM added transferring to a separatory funnel with the organic layer being separated into anhydrous MgSO<sub>4</sub> for further drying. Filtration through diatomaceous Earth into a 20 mL scintillation vial afforded 4.3161 g of PP13-TFSI after drying overnight in a vacuum desiccator. All glassware and the aqueous phase were extracted with an additional 50 mL, drying over the same MgSO<sub>4</sub> after separation from the aqueous phase. Filtration through a cotton plug into a round bottom flask was followed by solvent removal *in vacuo*, with a final transfer and drying *in vacuo* in a 20 mL scintillation vial using an additional 2×3 mL DCM. Drying overnight in a vacuum desiccator afforded a second crop of PP13-TFSI weighing 1.4327 g. Combined yield = 98% (1st = 73 %, 2nd = 25%).

#### NMR Spectroscopy of Ionic Liquid, Precursors, and 1,4-Butanedithiol

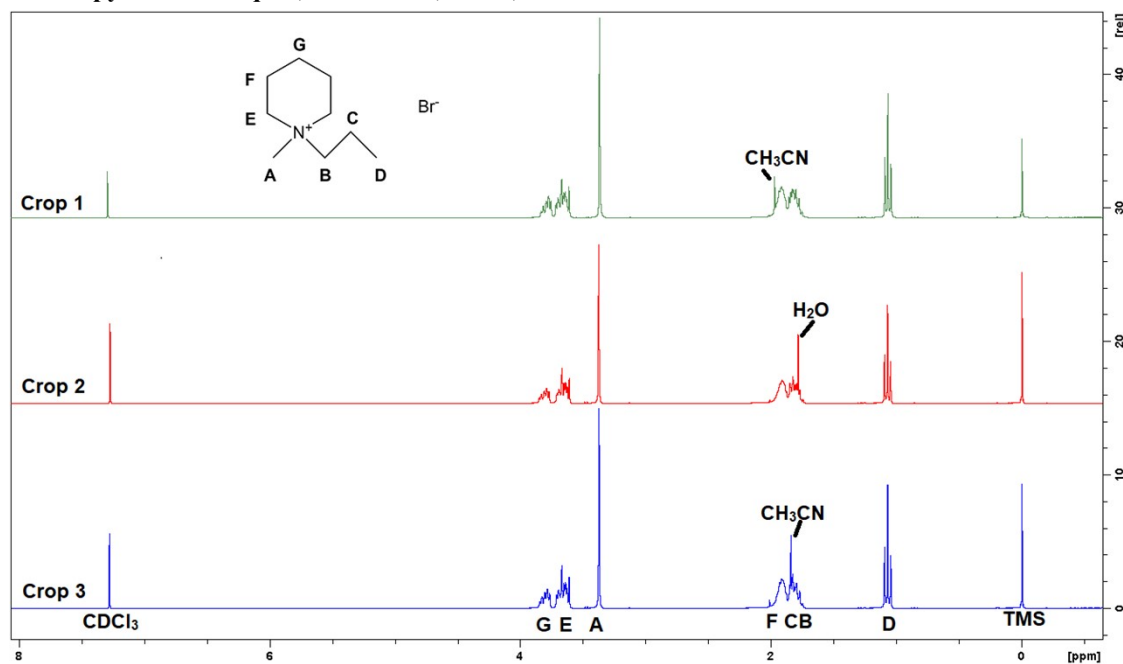

**Figure S1.** <sup>1</sup>H NMR spectra of [PP13][Br] in CDCl<sub>3</sub> (crops 1-3).

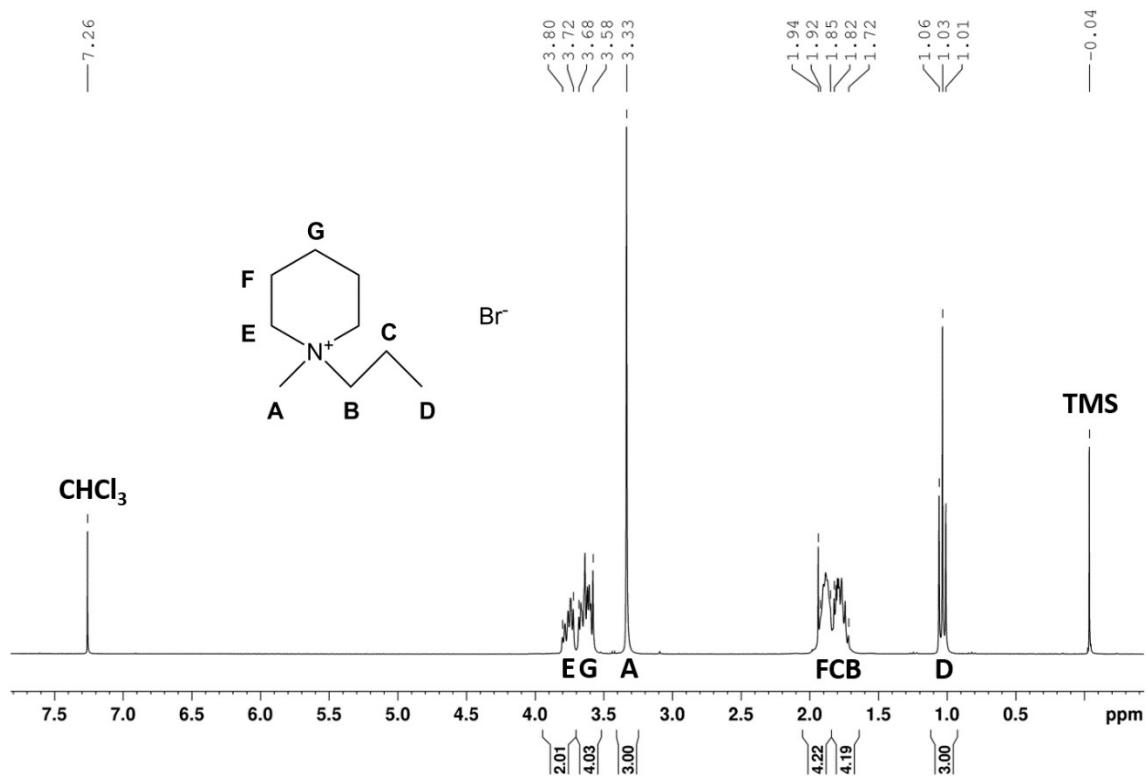

Figure S2. <sup>1</sup>H NMR spectra of [PP13][Br] in CDCl<sub>3</sub>.

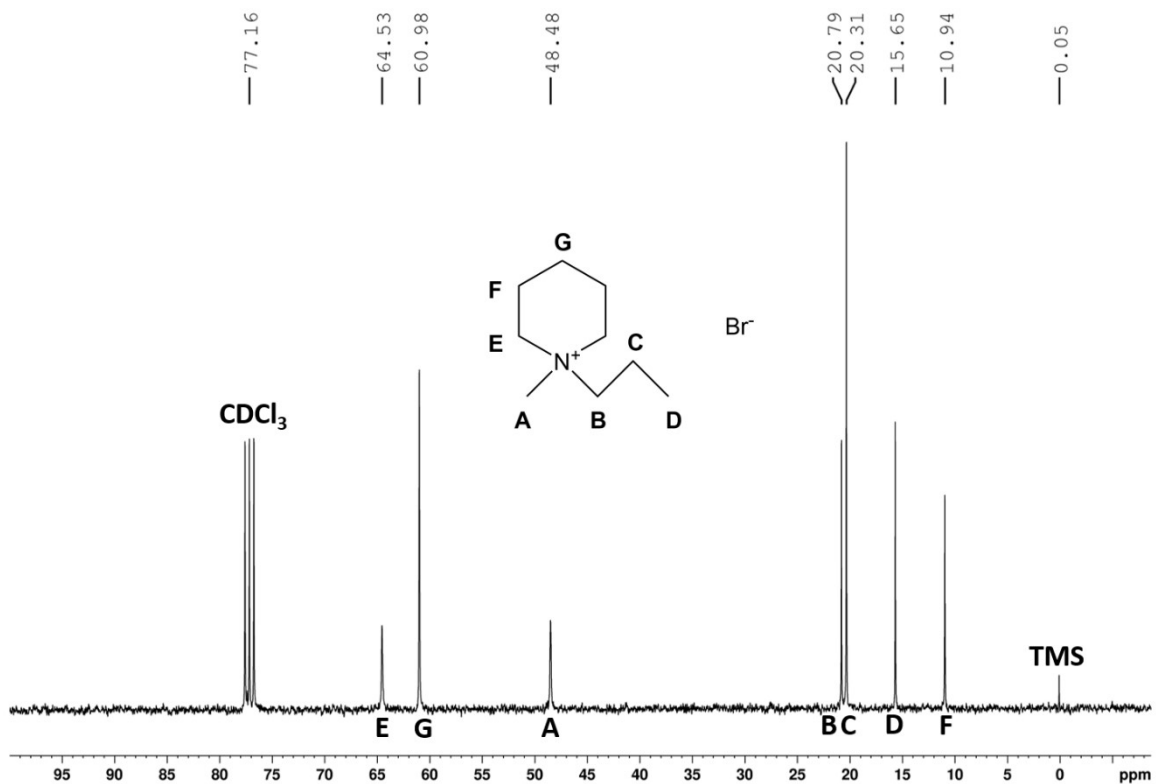

Figure S3. <sup>13</sup>C NMR spectra of [PP13][Br] in CDCl<sub>3</sub>.

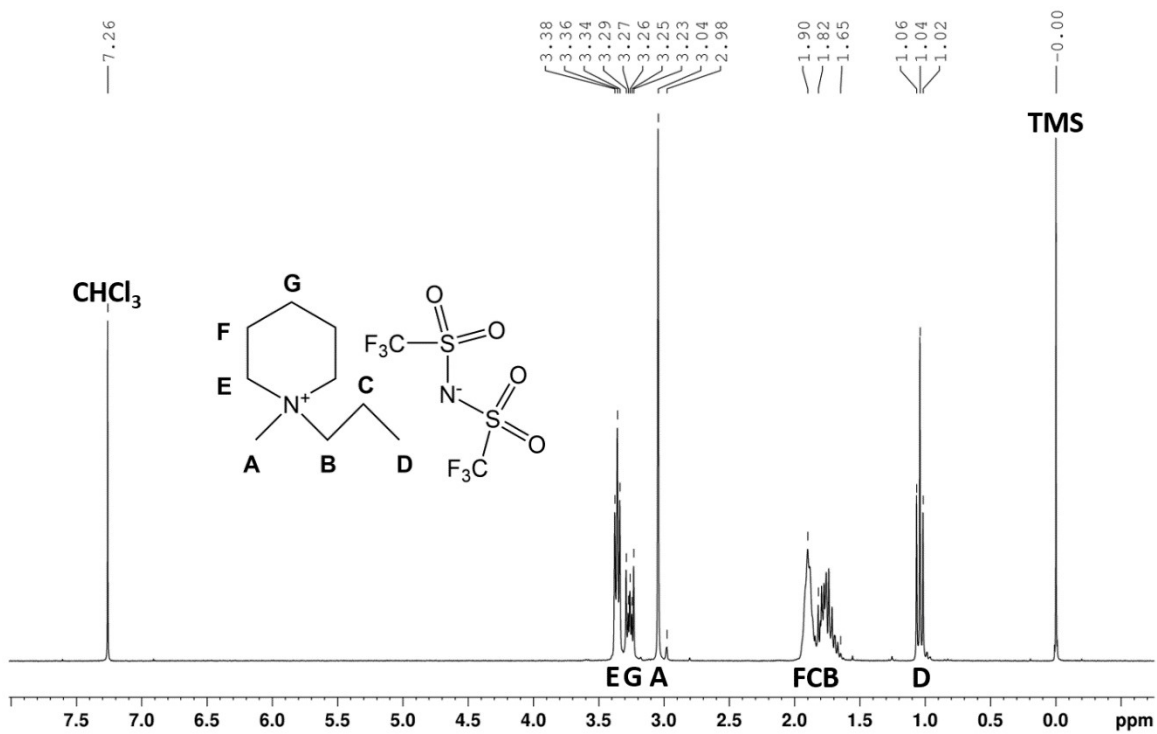

Figure S4. <sup>1</sup>H NMR spectra of [PP13][TFSI] in CDCl<sub>3</sub>.

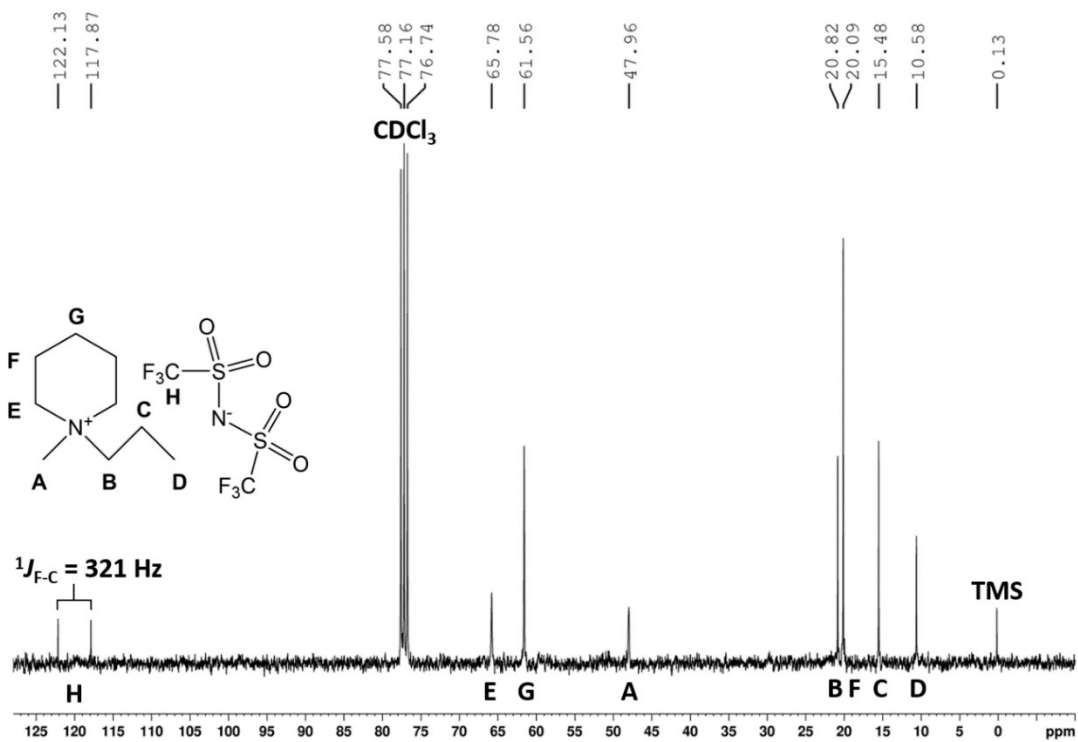

Figure S5. <sup>13</sup>C NMR spectra of [PP13][TFSI] in CDCl<sub>3</sub>.

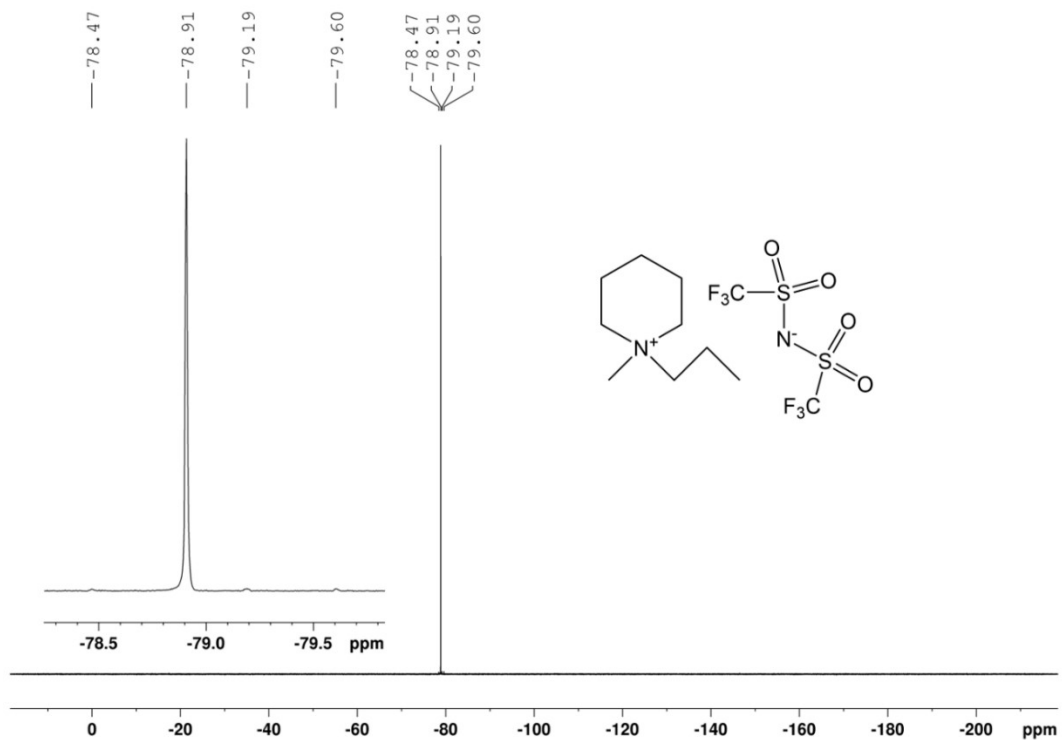

**Figure S6.**  $^{19}\text{F}$  NMR spectra of [PP13][TFSI] in  $\text{CDCl}_3$ .

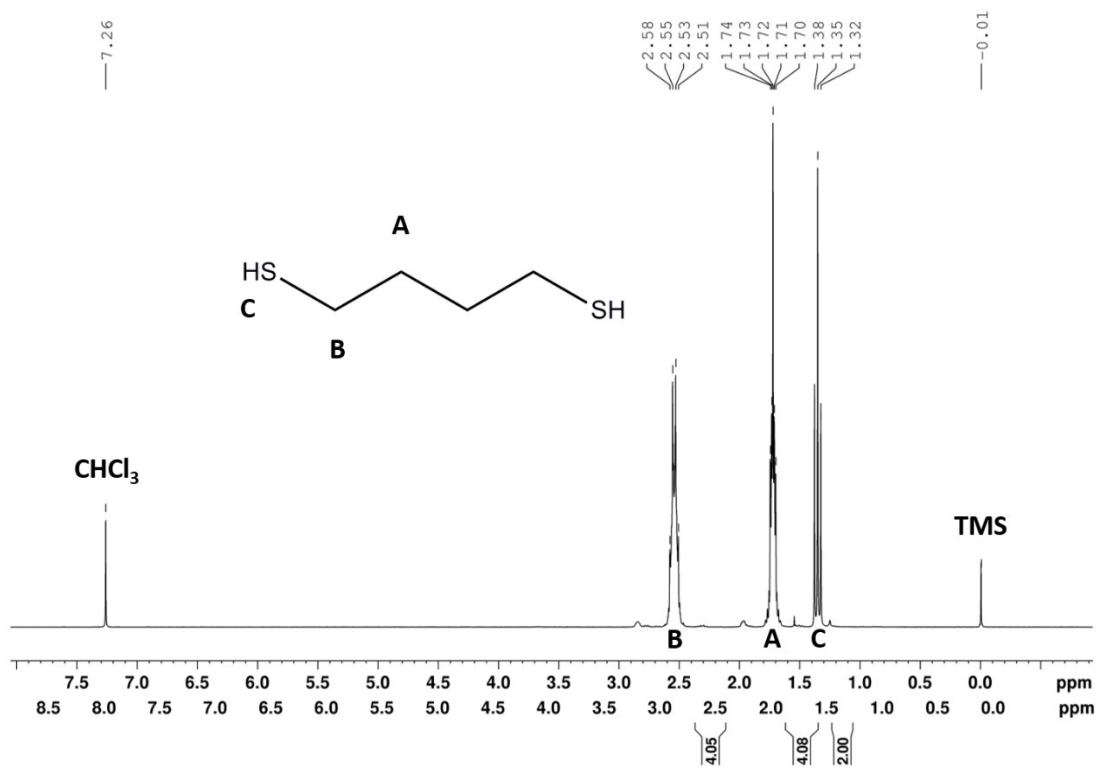

**Figure S7.**  $^1\text{H}$  NMR spectra of 1,4-butanedithiol in  $\text{CDCl}_3$ .



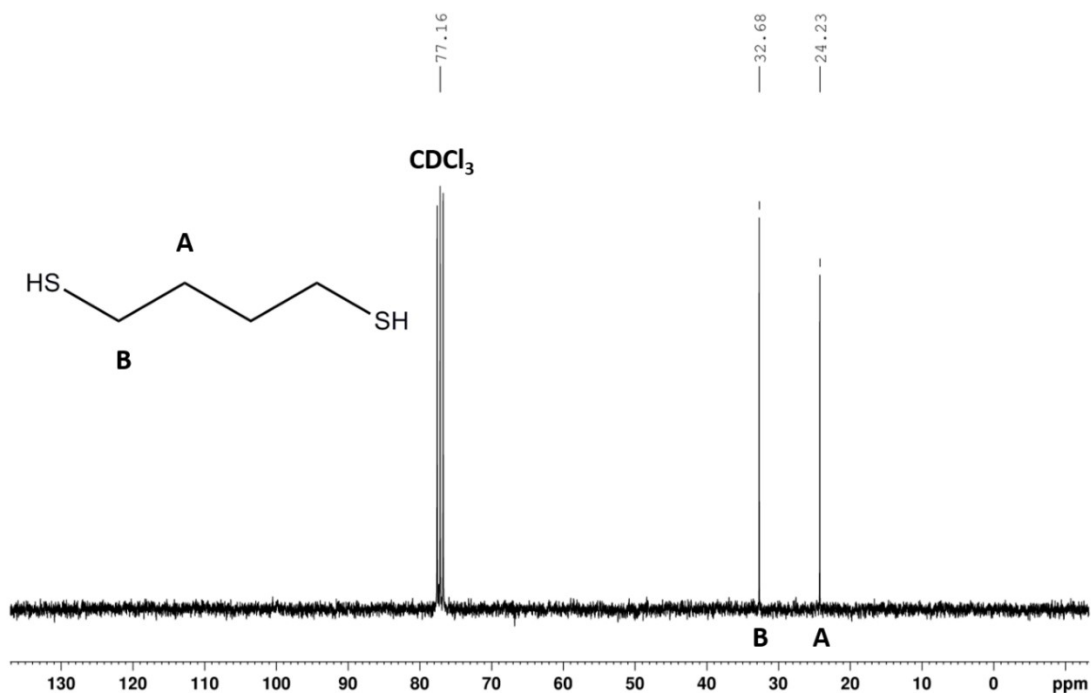

**Figure S8.** <sup>13</sup>C NMR spectra of 1,4-butanedithiol in CDCl<sub>3</sub>.

### Molybdenum Precursor

#### Synthesis Details

##### First synthesis of the Molybdenum Precursor – A1

To a 250 mL round bottom flask, 0.578g MoO<sub>3</sub> and ~75 mL ethylene glycol was heated under nitrogen to 194 °C for 1 hour with rapid stirring. The suspensions colour progressed from colourless with mint green powder to a dark turquoise solution at 180 °C as dissolution began, eventually turning into black at 190 °C, then to golden-brown after 40 minutes at 194 °C, and finally appearing dark reddish brown with a fine black precipitate after 1 hour at 194 °C. The crude reaction mixture was briefly exposed to air due to not using a Schlenk flask to provide N<sub>2</sub> flow during sampling for solvent compatibility and water exposure tests. This was allowed to sit under nitrogen for four days and then a vacuum distillation at 110 °C for 3 hours was done to remove most of the ethylene glycol, leaving a golden green paste that was extracted using 2×30 mL dichloromethane and the solution was filtered through a coarse glass frit quickly to minimize air exposure. The combined dichloromethane extracts were concentrated *in vacuo* affording a thick golden viscous liquid. A valve-less gas adapter was used while concentrating the solution and was swapped with a valved adapter and sealed under vacuum to transfer into the glovebox. The valve-less adapter had some viscous liquid residue on it, which took on a red colour upon air exposure, turning a rich blue overnight, indicating instability upon exposure to air. The sealed flask produced colourless crystals (C1a) from a gold viscous liquid. 44.5 mg of off-white crystals with a small amount of red clumps were isolated by rinsing the crude mixture with THF in a glass frit, resulting in a yield of 4.4% of Mo<sup>VI</sup>O<sub>2</sub>(OC<sub>2</sub>H<sub>4</sub>OH)<sub>2</sub>, the identity of which was determined by single crystal X-ray diffraction, supported by elemental analysis Concentrating the THF/ethylene glycol filtrate *in vacuo* afforded a golden solution

(B1a).

Analytical Calc. for  $C_4H_{10}MoO_6$ : C: 19.21% H: 4.03% N: 0.00% Found: C: 19.23% H: 4.09% N: 0.00%

#### Second Synthesis of the Molybdenum Precursor – A2

In a 250 mL Schlenk flask, 0.800 g  $MoO_3$  and 125 mL ethylene glycol was heated to 194 °C for 1 hour under  $N_2$  resulting in the same colour change the first synthesis, turning greenish blue at ~184 °C followed by a golden-brown/black. Upon cooling to 80 °C, a vacuum distillation was started, and heating was increased to 110-115 °C for 3 hours, which was stopped and left to sit under  $N_2$  until the next day and resumed for an additional 5 hours until about 3 mL of golden viscous liquid was present with a green paste. 1x100 mL dichloromethane was added and left to stir for 1 hour. The filtration utilized a two ended frit with a 1.5 cm pad of diatomaceous earth on the side of the crude extract and was filtered into a second 250 mL Schlenk flask with positive pressure from the reaction flask. The golden extract was reduced to ~ 3 mL golden viscous liquid that was sealed under vacuum and transferred to the glovebox. This was then transferred to a 20 mL vial with ~10 mL THF and the solvent was removed *in vacuo*. The residue had hexane added which did not dissolve the solid, so it was removed, and toluene was added with subsequent removal *in vacuo*. 2x5 mL THF was used to extract the solid through a celite filled pipet filter, affording a filtrate which, upon cooling, was a thick golden viscous liquid with yellow crystals (C2a) identified to be  $(Mo^V O(OC_2H_4OH)(\mu-OC_2H_4OH))_2(\mu-OC_2H_4)$  by SC-XRD. Filtering and rinsing the solid with THF 2x and drying *in vacuo* afforded 374 mg of a yellow opaque solid (D2a) and removal of THF *in vacuo* from the filtrate left a thick green viscous liquid (B2a). The residue on the diatomaceous earth pad from the dichloromethane filtration was rinsed with water and dried *in vacuo* affording crystals of  $Mo^VI O_2(OC_2H_4OH)_2$  (C2b, identified by SC-XRD) in a dark green viscous liquid.

Analytical Calc. for  $C_{12}H_{28}Mo_2O_{11}$ : C: 26.68% H: 5.22%. Found: C: 27.59% H: 3.19%.

#### Fourth Synthesis of the Molybdenum Precursor – A4

To a 250 mL round bottom flask 0.466 g  $MoO_3$  and 50 mL ethylene glycol were heated in a distillation set up under vacuum to 170 °C removing ~6 mL colourless liquid prior to heating. The flask was filled with  $N_2$  and heated to 194 °C, with the colour changing from greenish blue at 170 °C to golden-brown at 194 °C. The temperature was increased from 194 °C to 215 °C over 1 hour resulting in a black suspension in brown liquid that was heated for an additional 2 hours, followed by cooling with vacuum distillation at 130 °C, then the black remaining solid was heated under vacuum at 160 °C until dry. The flask was transferred to the glovebox and transferred into a 20 mL scintillation vial yielding 0.491 g of a lustrous, metallic black solid (D4a). The residue in the flask was dissolved in water and transferred to a 20 mL vial in a -18 °C freezer with atmospheric exposure, resulting in a blue solution (B4a) forming very tiny blue crystals (C4a) that rapidly melted/dissolved upon warming. By SC-XRD, the blue crystal was identified as a highly hydrated  $Mo_{12}O_{40}X$  cluster with an unknown central atom or alkali/alkaline earth

cations between the Mo/O/X clusters. Drying the blue solution *in vacuo* afforded a dark blue amorphous solid (D4b).

#### Seventh Synthesis of the Molybdenum Precursor – A7

In an apparatus composed of a Schlenk reaction flask and round bottom collection flask with vacuum distillation adaptors, 282 mg of MoO<sub>3</sub> and 35 mL ethylene glycol were heated to 194 °C under nitrogen flow, forming dark golden solution in 1.5 hours after reaching temperature. Vacuum distillation was conducted for ~2 hours at 125 °C on the heating mantle with aide from a heat gun (upper walls of flask not touched by heating mantle) to a green paste. Triplicate extraction with 3×15 mL dichloromethane, filtering through a coarse frit, and removal of solvent *in vacuo* afforded a golden viscous liquid (B7a). Rinsing with THF afforded 59 mg of a yellow microcrystalline solid.

#### Eighth Synthesis of the Molybdenum Precursor – A8

In an apparatus composed on two Schlenk flasks set up for distillation, 128 mg of MoO<sub>3</sub> and 20 mL ethylene glycol were heated to 150 °C under nitrogen flow, forming a homogenous golden solution in 2.5 hours after reaching temperature. Cooling afforded no precipitate when sealed overnight. Vacuum distillation was conducted for ~4 hours between 100-120 °C in an aluminum block on a hotplate with aide from a heat gun (upper walls of flask not touched by heating mantle) to a final volume of 1 mL gold viscous liquid (B8a). Addition of 10 mL 95 % ethanol afforded a rich blue solution (B8b) and filtration followed by rinsing with 10 mL diethyl ether afforded < 5 mg residue on the filter paper. The filtrate was dried *in vacuo* affording a dark blue solid of unknown identity weighing 181 mg (D8a).

Table S1 Reagents and reaction conditions associated with the 8 molybdenum precursor syntheses.

| Rxn.   | MoO <sub>3</sub> mass (g) | Ethylene glycol (EG) volume (mL) | Concentration (g MoO <sub>3</sub> /mL ethylene glycol) | Reaction time (min) | Temperature (± 2 °C) |
|--------|---------------------------|----------------------------------|--------------------------------------------------------|---------------------|----------------------|
| A1     | 0.578                     | 75                               | 0.008                                                  | 60                  | 194                  |
| A2     | 0.800                     | 125                              | 0.006                                                  | 60                  | 194                  |
| A3     | 0.345                     | 40                               | 0.008                                                  | 60                  | 194                  |
| A4     | 0.466                     | 50                               | 0.009                                                  | 120                 | 215                  |
| A5     | 0.544                     | 70                               | 0.008                                                  | 60                  | 194                  |
| A6     | 0.286                     | 35                               | 0.008                                                  | 60                  | 194                  |
| A7     | 0.128                     | 20                               | 0.006                                                  | 90                  | 194                  |
| A8     | 0.282                     | 35                               | 0.008                                                  | 150                 | 150                  |
| Mean   | 0.429                     | 56                               | 0.008                                                  | 80                  | 191                  |
| St.Dev | 0.211                     | 33                               | 0.001                                                  | 35                  | 18                   |

**Table S2.** Synthetic conditions, work up, purification processes, and products isolated from the 8 molybdenum precursor syntheses. Volume in brackets = EG distilled prior to heat.

| Rxn. | Pre-distill EG before 194 °C? | N <sub>2</sub> flow? Air exposure ? | Solvents for purification or Workup Procedure?                                                            | Products isolated                                                                                                                                                                     |
|------|-------------------------------|-------------------------------------|-----------------------------------------------------------------------------------------------------------|---------------------------------------------------------------------------------------------------------------------------------------------------------------------------------------|
| A1   | No                            | Yes, minor                          | Vacuum distill to green paste, DCM extraction, THF wash                                                   | Colourless crystals of MoO <sub>2</sub> (OC <sub>2</sub> H <sub>4</sub> (OH)) <sub>2</sub> and golden viscous liquid                                                                  |
| A2   | No                            | Yes, trace                          | Vacuum distill to green paste, DCM extraction, THF transfer, hexane and toluene insoluble, THF extraction | Green solid, yellow crystals from green viscous liquid, Colourless crystals of MoO <sub>2</sub> (OC <sub>2</sub> H <sub>4</sub> (OH)) <sub>2</sub> upon partial hydrolysis of residue |
| A3   | Yes (~5 mL)                   | Yes, no                             | Vacuum distill, filter                                                                                    | Golden viscous liquid, Colourless crystals of MoO <sub>2</sub> (OC <sub>2</sub> H <sub>4</sub> (OH)) <sub>2</sub> after 10 months under N <sub>2</sub>                                |
| A4   | Yes (~6 mL)                   | Yes, no                             | Vacuum distill, scrape                                                                                    | Black solid, blue crystal of Mo <sub>12</sub> O <sub>40</sub> X upon hydration of residue                                                                                             |
| A5   | No                            | Yes, no                             | Vacuum distill, filter, rinse residue into separate container with THF                                    | Golden-brown viscous liquid and gold/yellow crystals                                                                                                                                  |
| A6   | No (~10 mL)                   | Yes, no                             | Vacuum distill, filter, rinse residue into separate container with THF                                    | Brown viscous liquid with black solids, red crystals                                                                                                                                  |
| A7   | No                            | Yes, no                             | Vacuum distill to green paste, DCM extraction, THF wash                                                   | Yellow crystals, gold viscous liquid                                                                                                                                                  |
| A8   | No                            | No, no                              | Vacuum distill, 95% ethanol, filter, dry                                                                  | Gold viscous liquid turned into blue liquid then dried to blue solid                                                                                                                  |

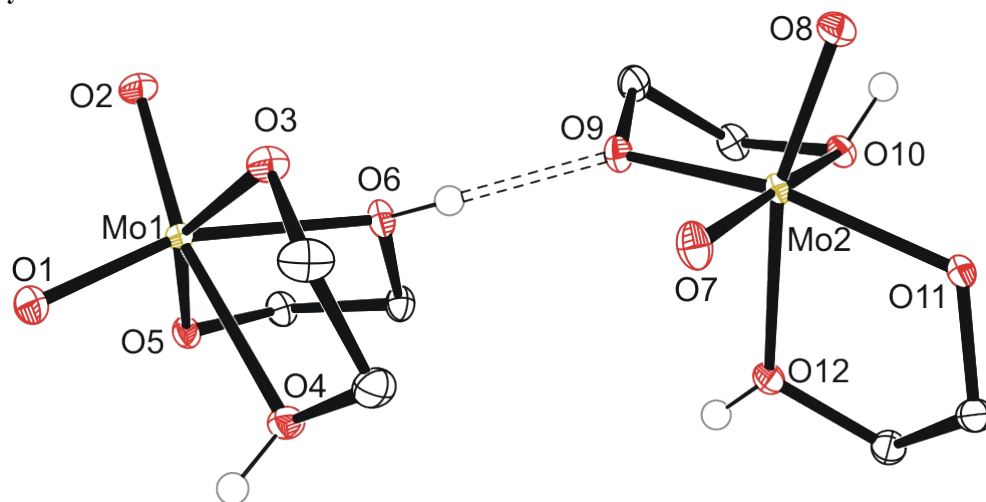

**Figure S9.** Molecular structure of the two molecules in the asymmetric unit cell of compound **1** participating in hydrogen bonding with anisotropic displacement ellipsoids projected at the 50% probability level. Methylene CH<sub>2</sub> hydrogen atoms have been omitted for clarity.

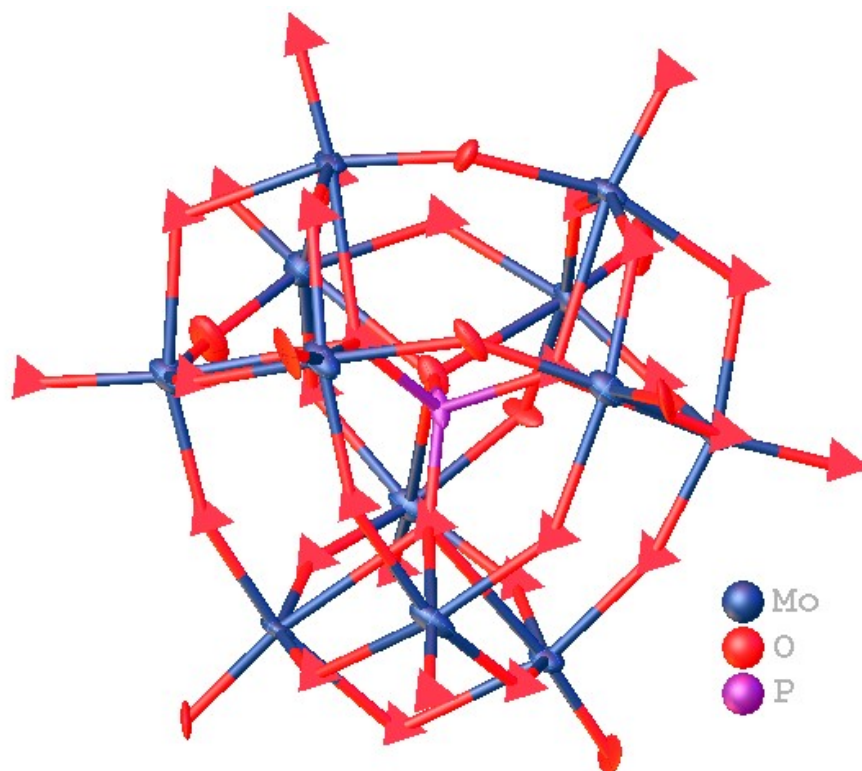

**Figure S10.** OLEX2 screenshot<sup>2</sup> showing the large anionic heteroatom-containing cluster [Mo<sub>12</sub>O<sub>40</sub>X]<sup>-n</sup> where X is best modelled as phosphorus, suggesting this is a tri- or pentaanionic cluster with a lot of water of solvation. This is the dataset derived from a single isolated blue crystal (**C4a**) from hydrolysis of **D4a** residue, filtration, and freezing at -18 °C. Co-crystallized solvent and cations could not be modelled effectively and were removed for this image. Poor data resulted in only evidence of this cluster forming with inconclusive structural/compositional determinations.

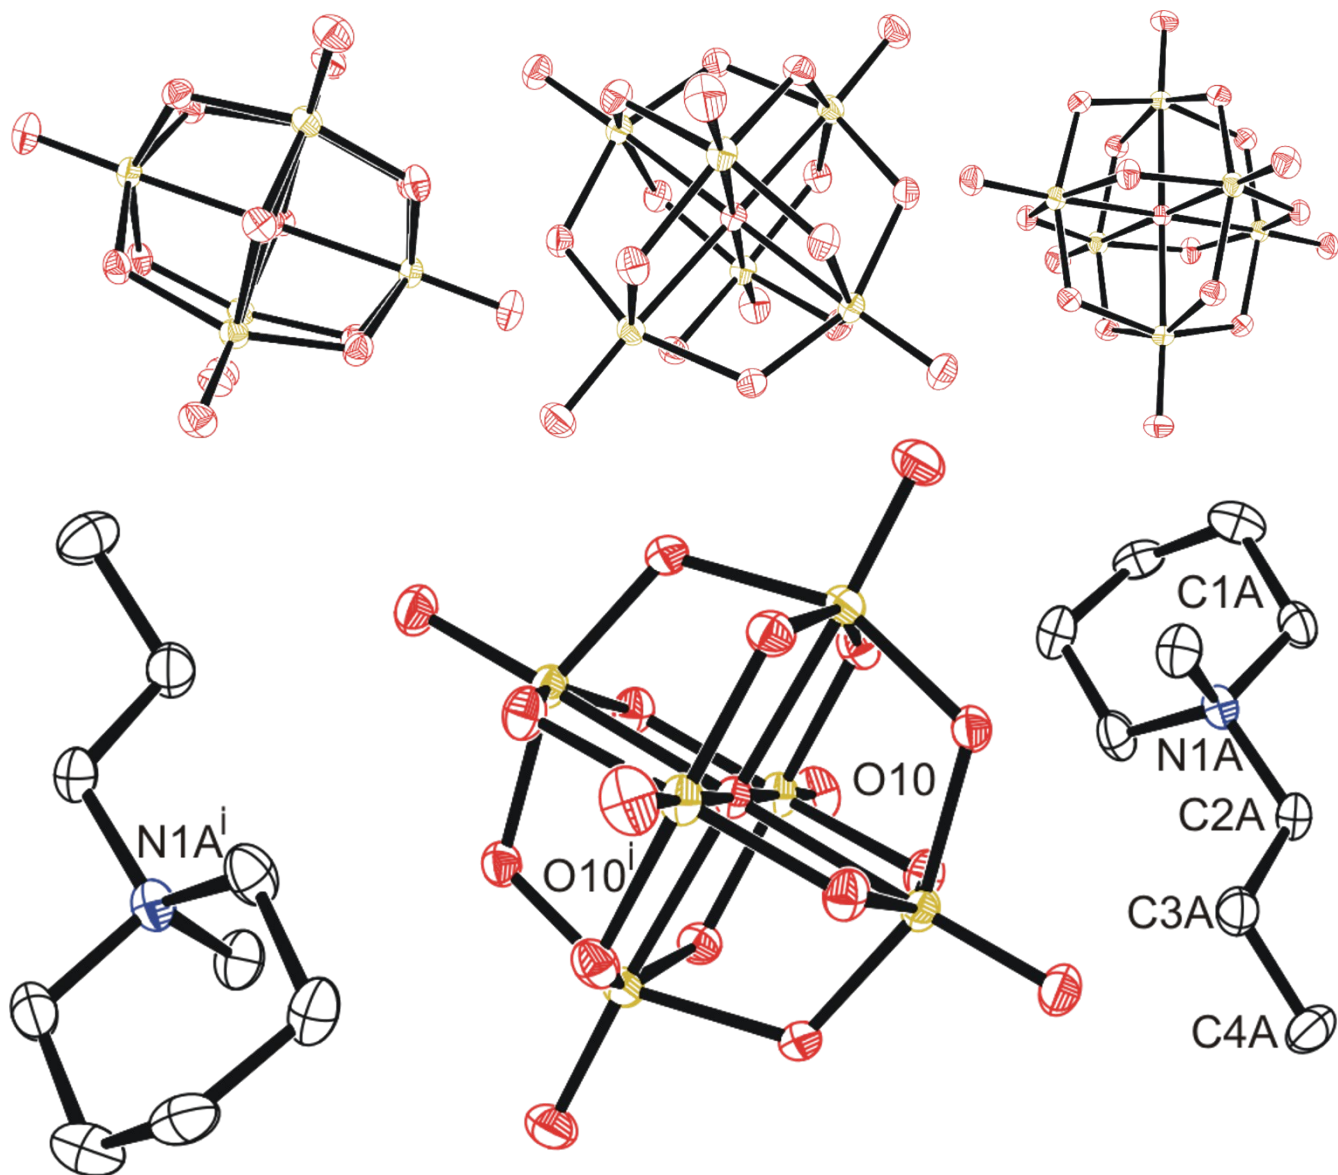

**Figure S11.** Molecular structure of the single yellow crystal (**C3b**) compound **5** with anisotropic displacement ellipsoids projected at the 50% probability level. Hydrogen atoms have been omitted for clarity. From top left to right represent views of the dianion  $[\text{Mo}_6\text{O}_{19}]^{2-}$  down the  $a$ ,  $b$ , and  $c$  axes respectively. The bottom image represents the complete structure of compound **5**;  $[\text{PP13}]_2[\text{Mo}_6\text{O}_{19}]$ . Oxygen = red, molybdenum = yellow.

**Table S3.** Data derived from single crystal X-ray diffraction of crystals of compounds **1-5**.

| Compound                                                                      | Compound 1                                      | Compound 2                                                                                      | Compound 3                                                      | Compound 4                                                                                                        | Compound 5                                                             |
|-------------------------------------------------------------------------------|-------------------------------------------------|-------------------------------------------------------------------------------------------------|-----------------------------------------------------------------|-------------------------------------------------------------------------------------------------------------------|------------------------------------------------------------------------|
| Chemical formula                                                              | C <sub>4</sub> H <sub>10</sub> MoO <sub>6</sub> | C <sub>8</sub> H <sub>18</sub> Mo <sub>2</sub> O <sub>10</sub> •C <sub>4</sub> H <sub>8</sub> O | C <sub>16</sub> H <sub>36</sub> Mo <sub>4</sub> O <sub>20</sub> | C <sub>24</sub> H <sub>54</sub> Mo <sub>8</sub> O <sub>32</sub> •2(C <sub>2</sub> H <sub>6</sub> O <sub>2</sub> ) | [Mo <sub>6</sub> O <sub>19</sub> ]•2[C <sub>9</sub> H <sub>20</sub> N] |
| Formula Mass                                                                  | 250.06                                          | 538.21                                                                                          | 932.21                                                          | 1746.32                                                                                                           | 1164.16                                                                |
| Crystal system                                                                | Tetragonal                                      | Orthorhombic                                                                                    | Orthorhombic                                                    | Triclinic                                                                                                         | Monoclinic                                                             |
| <i>a</i> /Å                                                                   | 9.46450(10)                                     | 16.7363(3)                                                                                      | 34.2851(19)                                                     | 8.5318(4)                                                                                                         | 9.4347(8)                                                              |
| <i>b</i> /Å                                                                   | 9.46450(10)                                     | 24.6210(5)                                                                                      | 9.7131(5)                                                       | 11.0284(5)                                                                                                        | 16.0288(12)                                                            |
| <i>c</i> /Å                                                                   | 17.3160(4)                                      | 8.8062(2)                                                                                       | 8.4881(4)                                                       | 14.5245(7)                                                                                                        | 10.9136(9)                                                             |
| <i>α</i> /°                                                                   | 90                                              | 90                                                                                              | 90                                                              | 81.706(2)                                                                                                         | 90                                                                     |
| <i>β</i> /°                                                                   | 90                                              | 90                                                                                              | 90                                                              | 77.862(2)                                                                                                         | 101.838(3)                                                             |
| <i>γ</i> /°                                                                   | 90                                              | 90                                                                                              | 90                                                              | 69.992(2)                                                                                                         | 90                                                                     |
| Unit cell volume/Å <sup>3</sup>                                               | 1551.11(5)                                      | 3628.72(13)                                                                                     | 2826.7(3)                                                       | 1251.55(10)                                                                                                       | 1615.3(2)                                                              |
| Temperature/K                                                                 | 100.0                                           | 125.0                                                                                           | 125                                                             | 125.0                                                                                                             | 125.0                                                                  |
| Space group                                                                   | <i>P</i> 4 <sub>1</sub>                         | Fdd2                                                                                            | <i>P</i> na2 <sub>1</sub>                                       | <b><i>P</i>Error!</b>                                                                                             | <i>P</i> 2 <sub>1</sub> /n                                             |
| No. of formula units per unit cell, <i>Z</i>                                  | 8                                               | 8                                                                                               | 4                                                               | 1                                                                                                                 | 2                                                                      |
| Radiation type                                                                | MoKα                                            | MoKα                                                                                            | MoKα                                                            | MoKα                                                                                                              | MoKα                                                                   |
| Absorption coefficient, μ/mm <sup>-1</sup>                                    | 1.675                                           | 1.436                                                                                           | 1.819                                                           | 2.040                                                                                                             | 2.339                                                                  |
| No. of reflections measured                                                   | 110585                                          | 26440                                                                                           | 281817                                                          | 126602                                                                                                            | 55716                                                                  |
| No. of independent reflections                                                | 12760                                           | 3835                                                                                            | 13707                                                           | 10104                                                                                                             | 6194                                                                   |
| R <sub>int</sub>                                                              | 0.0334                                          | 0.0568                                                                                          | 0.0390                                                          | 0.0407                                                                                                            | 0.0377                                                                 |
| Final <i>R</i> <sub><i>I</i></sub> values ( <i>I</i> > 2σ( <i>I</i> ))        | 0.0208                                          | 0.0309                                                                                          | 0.0655                                                          | 0.0219                                                                                                            | 0.0332                                                                 |
| Final <i>wR</i> ( <i>F</i> <sup>2</sup> ) values ( <i>I</i> > 2σ( <i>I</i> )) | 0.0508                                          | 0.0448                                                                                          | 0.1327                                                          | 0.0528                                                                                                            | 0.0704                                                                 |
| Final <i>R</i> <sub><i>I</i></sub> values (all data)                          | 0.0223                                          | 0.0485                                                                                          | 0.0682                                                          | 0.0267                                                                                                            | 0.0394                                                                 |
| Final <i>wR</i> ( <i>F</i> <sup>2</sup> ) values (all data)                   | 0.0518                                          | 0.0487                                                                                          | 0.1339                                                          | 0.0554                                                                                                            | 0.0731                                                                 |

**Table S4.** Hydrogen bonding interactions observed for compounds **1-4**.

| Donor                                                                                                                                                                                                                                                                                                                                                                                                    | H    | Acceptor          | d(D-H)/Å  | d(H-A)/Å  | d(D-A)/Å   | D-H-A/° |
|----------------------------------------------------------------------------------------------------------------------------------------------------------------------------------------------------------------------------------------------------------------------------------------------------------------------------------------------------------------------------------------------------------|------|-------------------|-----------|-----------|------------|---------|
| Compound <b>1</b> – MoO <sub>6</sub> C <sub>4</sub> H <sub>10</sub>                                                                                                                                                                                                                                                                                                                                      |      |                   |           |           |            |         |
| O4                                                                                                                                                                                                                                                                                                                                                                                                       | H4   | O3 <sup>1</sup>   | 0.851(13) | 1.852(14) | 2.7000(18) | 174(4)  |
| O6                                                                                                                                                                                                                                                                                                                                                                                                       | H6   | O9                | 0.854(13) | 1.836(19) | 2.6406(17) | 156(4)  |
| O10                                                                                                                                                                                                                                                                                                                                                                                                      | H10  | O5 <sup>2</sup>   | 0.855(13) | 1.808(15) | 2.6517(16) | 169(4)  |
| O12                                                                                                                                                                                                                                                                                                                                                                                                      | H12  | O11 <sup>3</sup>  | 0.76(4)   | 1.75(4)   | 2.5047(17) | 171(4)  |
| Compound <b>2</b> – Mo <sub>2</sub> O <sub>10</sub> C <sub>8</sub> H <sub>18</sub> •(OC <sub>4</sub> H <sub>8</sub> , THF)                                                                                                                                                                                                                                                                               |      |                   |           |           |            |         |
| O5                                                                                                                                                                                                                                                                                                                                                                                                       | H5   | O2 <sup>4</sup>   | 0.89(3)   | 1.93(3)   | 2.814(2)   | 175(4)  |
| Compound <b>3</b> – Mo <sub>4</sub> O <sub>20</sub> C <sub>16</sub> H <sub>36</sub>                                                                                                                                                                                                                                                                                                                      |      |                   |           |           |            |         |
| O5                                                                                                                                                                                                                                                                                                                                                                                                       | H5   | O4                | 0.873(13) | 1.83(3)   | 2.582(9)   | 142(3)  |
| O5                                                                                                                                                                                                                                                                                                                                                                                                       | H5   | O18 <sup>5</sup>  | 0.873(13) | 2.67(6)   | 3.273(9)   | 127(6)  |
| O17                                                                                                                                                                                                                                                                                                                                                                                                      | H17  | O11               | 0.84      | 1.79      | 2.561(10)  | 151.7   |
| C5                                                                                                                                                                                                                                                                                                                                                                                                       | H5B  | O18 <sup>5</sup>  | 0.99      | 2.52      | 3.268(15)  | 132.6   |
| C6                                                                                                                                                                                                                                                                                                                                                                                                       | H6B  | O14B <sup>6</sup> | 0.99      | 2.32      | 3.19(4)    | 147     |
| C8                                                                                                                                                                                                                                                                                                                                                                                                       | H8A  | O1A <sup>7</sup>  | 0.99      | 2.08      | 2.91(4)    | 140.2   |
| C13                                                                                                                                                                                                                                                                                                                                                                                                      | H13A | O10 <sup>8</sup>  | 0.99      | 2.52      | 3.203(12)  | 126.1   |
| C14                                                                                                                                                                                                                                                                                                                                                                                                      | H14B | O10 <sup>8</sup>  | 0.99      | 2.42      | 3.066(12)  | 122.5   |
| O1A                                                                                                                                                                                                                                                                                                                                                                                                      | H1A  | O7                | 0.84      | 2.23      | 2.67(4)    | 112.9   |
| O14A                                                                                                                                                                                                                                                                                                                                                                                                     | H14C | O15               | 0.84      | 1.86      | 2.685(13)  | 168.7   |
| Compound <b>4</b> – Mo <sub>8</sub> O <sub>32</sub> C <sub>24</sub> H <sub>54</sub> •2(C <sub>2</sub> H <sub>4</sub> (OH) <sub>2</sub> , ethylene glycol)                                                                                                                                                                                                                                                |      |                   |           |           |            |         |
| O12                                                                                                                                                                                                                                                                                                                                                                                                      | H12  | O8                | 0.74(3)   | 1.95(3)   | 2.686(2)   | 174(4)  |
| O13                                                                                                                                                                                                                                                                                                                                                                                                      | H13  | O17               | 0.94(3)   | 1.62(3)   | 2.552(2)   | 170(3)  |
| O16                                                                                                                                                                                                                                                                                                                                                                                                      | H16  | O3 <sup>9</sup>   | 0.77(3)   | 1.73(3)   | 2.4891(19) | 174(4)  |
| O17                                                                                                                                                                                                                                                                                                                                                                                                      | H17  | O12               | 0.77(3)   | 1.89(3)   | 2.657(2)   | 171(4)  |
| O18                                                                                                                                                                                                                                                                                                                                                                                                      | H18  | O4 <sup>10</sup>  | 0.773(17) | 1.963(18) | 2.720(2)   | 166(3)  |
| Symmetry operators for relevant hydrogen bonding interactions indicated with superscripts on acceptor atoms: <sup>1</sup> 1+Y,2-X,-1/4+Z; <sup>2</sup> 2-X,1-Y,1/2+Z; <sup>3</sup> 3+Y,2-X,-1/4+Z; <sup>4</sup> 3/4-X,1/4+Y,-1/4+Z; <sup>5</sup> 5+X,+Y,1+Z; <sup>6</sup> 1-X,2-Y,1/2+Z; <sup>7</sup> 1/2-X,-1/2+Y,1/2+Z; <sup>8</sup> 8+X,-1+Y,-1+Z <sup>9</sup> 1-X,1-Y,1-Z; <sup>10</sup> -1+X,1+Y,+Z |      |                   |           |           |            |         |

Compound **1** has four hydrogen bonding interactions between mono-deprotonated ethylene glycol ligands. The asymmetric unit includes the O6-H6...O6 H-bond, while hydrogen bonds also occur between O12-H12...O11 across the symmetry element +Y,2-X,-0.25+Z, O4-H4...O3 across 2-X,1-Y,0.5+Z, and O10-H10...O5 across 2-X,1-Y,0.5+Z. Compound **2** has one intramolecular hydrogen bond between O6-H6...O3 across the symmetry element 0.75-X,0.25+Y,-0.25+Z. Compound **3** has three disordered ethylene glycol units in a 54:46, 50:50, and 63:37 ratio. Compound **3** has five hydrogen bonding interactions with one (O14B-H14D...O20) across the symmetry element 1-X,1-Y,-0.5+Z. The other four interactions occur between O5-H5...O4, O14A-H14C...O15, O17-H17...O11, and O1B-H1B...O7. Compound **4** has one disordered ethylene glycol methylene fragment in a 72:28 ratio. Co-crystallized ethylene glycol solvent participates extensively in hydrogen bonding within **4**. Intermolecular bonding



occurs first from O13-H13...O17 from the compound to the ethylene glycol, and the same hydroxy group donates back to the compound via O17-H17...O12 with further intramolecular bonding from O12-H12...O8. The other end of the ethylene glycol is hydrogen bound to an adjacent molecule of **4** as O18-H18...O4 across the symmetry element  $-1+X,1+Y,+Z$ . Additional intramolecular hydrogen bonding between each molecule of **4** from O16-H16...O3 across  $1-X,1-Y,1-Z$  exists, holding the symmetry equivalent halves of the structure together among other bonds.

#### Ratio of Molybdenum and Oxygen

Table S5 shows relevant Mo:O ratios observed within six SC-XRD samples showing the ratio of Mo:O drops as the colour of the viscous liquid the crystal was isolated from (and the crystal itself) darkens. Compound **1** isolated from **C1a**, **C2b**, and **C3a** has the highest Mo:O ratio of 1:6, while a drop is observed for the dimeric **2** from **B2a** green viscous liquid (1:5.5), the dimer-polymer **3** from **B5a** golden-brown viscous liquid (1:5), and the larger cluster **4** observed from **B6a** brown viscous liquid with either 1:4 as just the cluster, or 1:4.25 accounting for ethylene glycol solvation. Compounds **5** and **6** feature the lowest Mo:O ratios of 1:3.17 and 1:3.33 for the molybdenum oxide clusters  $[\text{Mo}_6\text{O}_{19}]^{-2}$  and  $[\text{Mo}_{12}\text{O}_{40}\text{X}]^{-n}$ , respectively.

**Table S5.** Mo:O ratios for each of the isolated crystalline samples from molybdenum precursor synthesis (**1-4**), electrochemical experiments (**5**), and hydrolysis (**6**).

| Compound | Mo:O ratio in crystal, reduced Mo:O ratio                                         |
|----------|-----------------------------------------------------------------------------------|
| 1        | <b>1:6</b>                                                                        |
| 2        | 2:11, ( <b>1:5.5</b> )                                                            |
| 3        | 4:20, ( <b>1:5</b> )                                                              |
| 4        | 8:32 (+ 4 co-crystallized solvent), ( <b>1:4</b> cluster, <b>1:4.25</b> compound) |
| 5        | 6:19, ( <b>1:3.17</b> )                                                           |
| 6        | 12:40, ( <b>1:3.33</b> )                                                          |

## Electrochemistry, Electrodeposition, and SEM Analysis

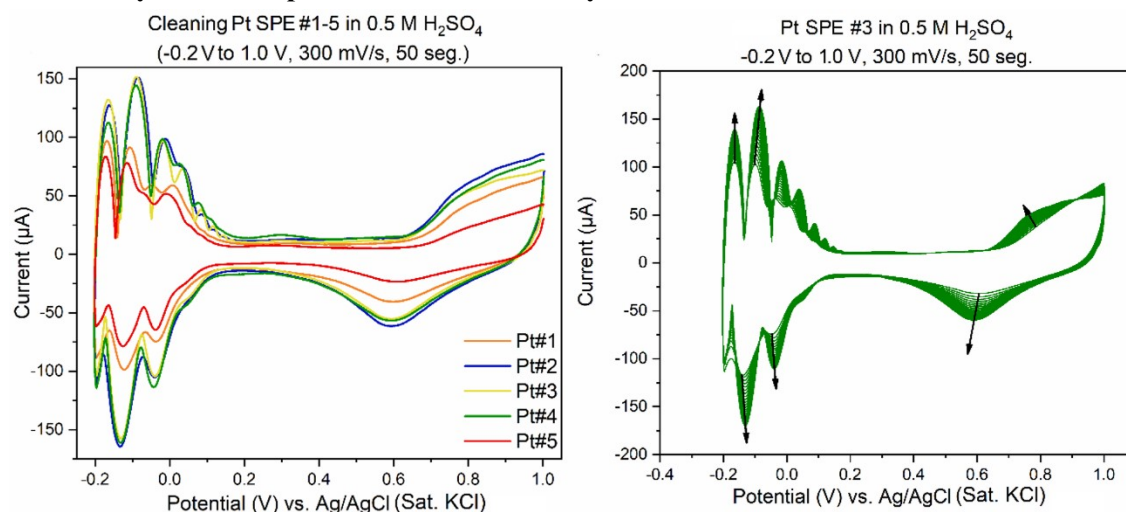

**Figure S12.** Final cyclic voltammogram of Pt SPE #1-5 (left) and 25 cycles of Pt SPE #3 (right) immersed in 0.5 M H<sub>2</sub>SO<sub>4</sub> within a window of -200 to 1000 mV vs. Ag/AgCl in sat. KCl gel. Difference in current indicates a difference in available surface area to transfer or receive more electrons, registering as a greater magnitude of total current. Current also increases within increasing scans from cleaning the surface of the electrode, revealing more of the platinum surface to adsorb hydrogen (- V) or oxygen (+ V).

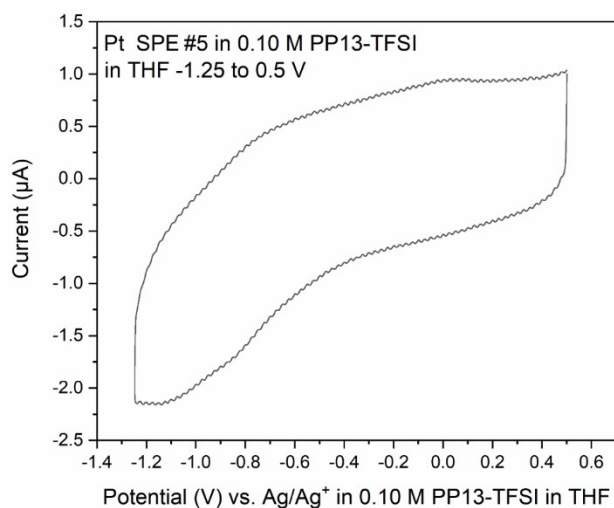

**Figure S13.** Double layer cyclic voltammogram showing the electrochemical window for the Pt SPE (-1.25 to 0.5 V) within the 0.1 M PP13-TFSI in THF supporting electrolyte solution (CE = Pt, RE = Ag/Ag<sup>+</sup> in 0.1 M PP13-TFSI). Sweep rate = 50 mV/s.

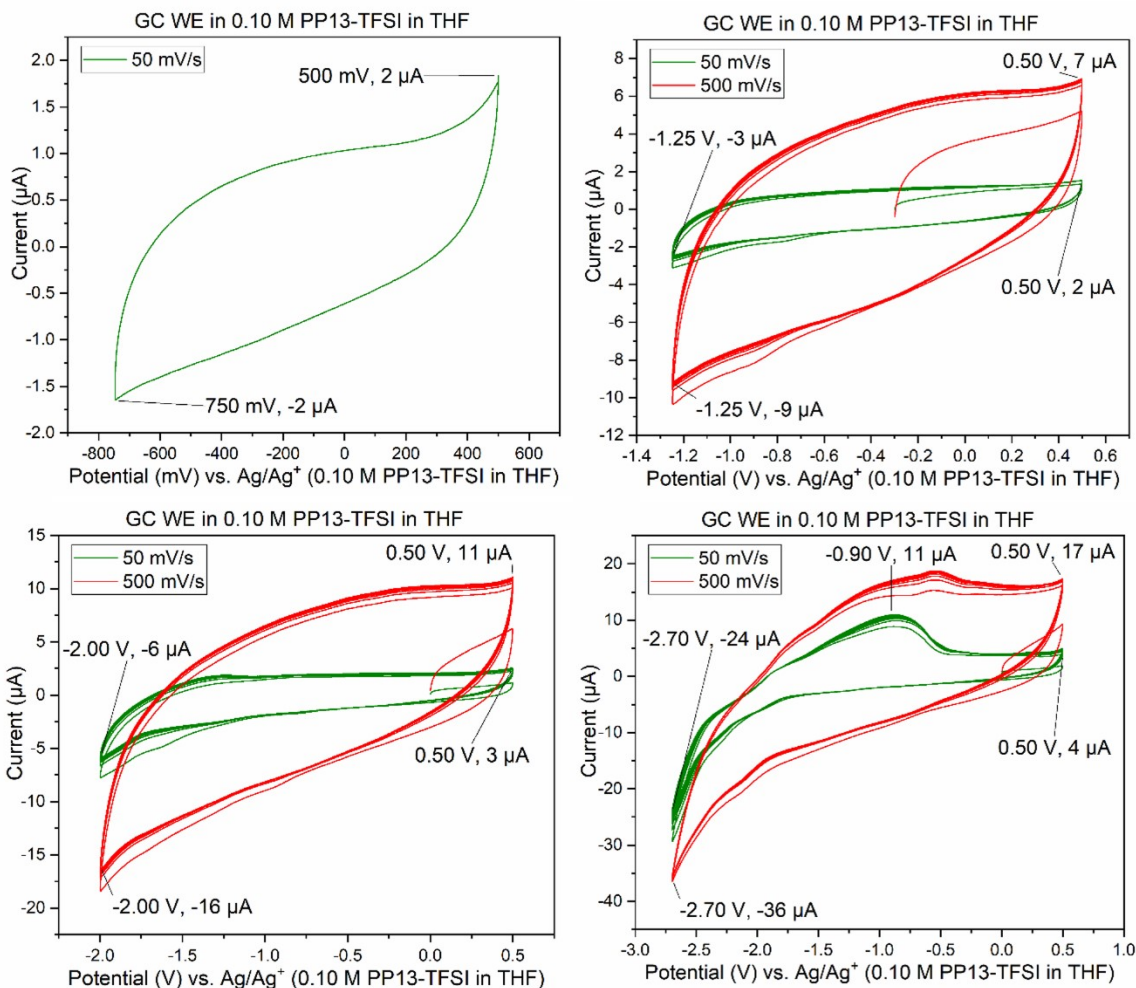

**Figure S14.** Electrochemical window elucidation for the 0.10 M PP13-TFSI in THF solution used for later electrochemical studies. For all but the first chromatogram, 6 cycles are shown for each sweep rate of either 50 (green) or 500 (red) mV/s.

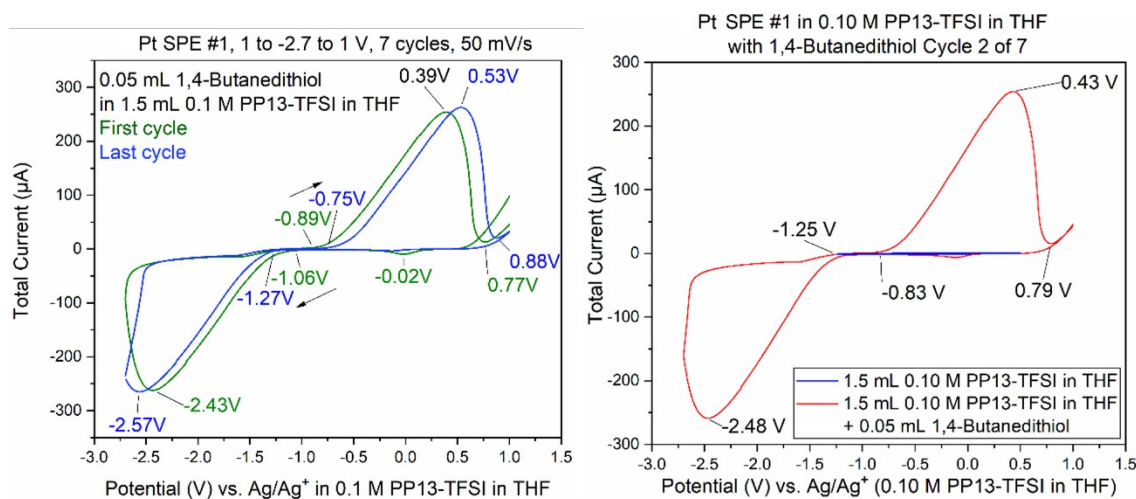

**Figure S15.** CV of 0.05 mL 1,4-butanedithiol added to 1.5 mL of 0.1 M PP13-TFSI in THF cycled between -2.7 V to +1.0 V at 50 mV/s. Left shows the difference between first and last cycles, while right displays the second cycle alongside a cycle in pure 0.1 M PP13-TFSI in THF.

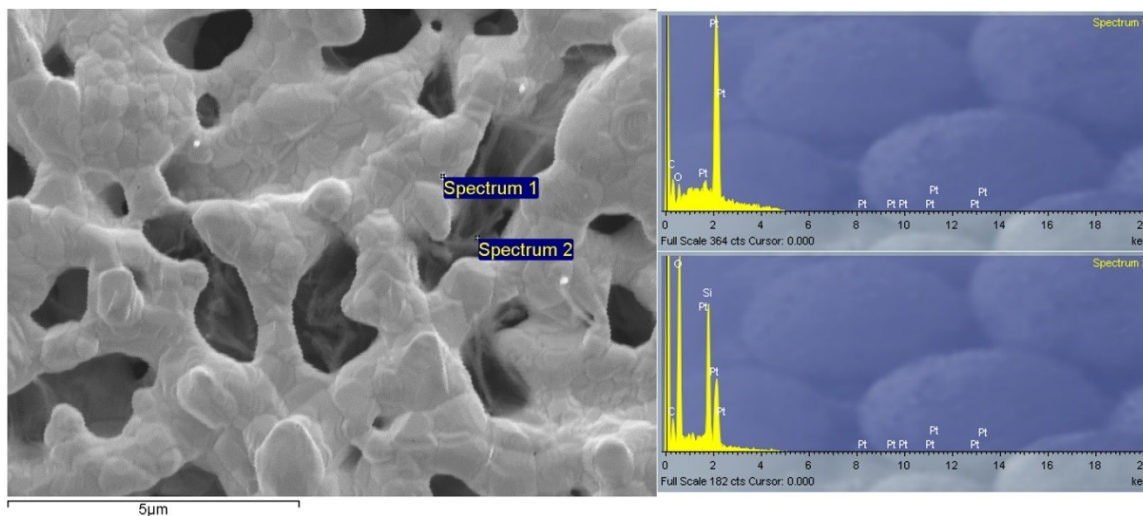

**Figure S16.** SEM-EDS analysis of Pt SPE #1 following electrochemistry within 1.5 mL 0.1 M PP13-TFSI in THF with 0.05 mL 1,4-butanedithiol with the corresponding SE reference image (left).

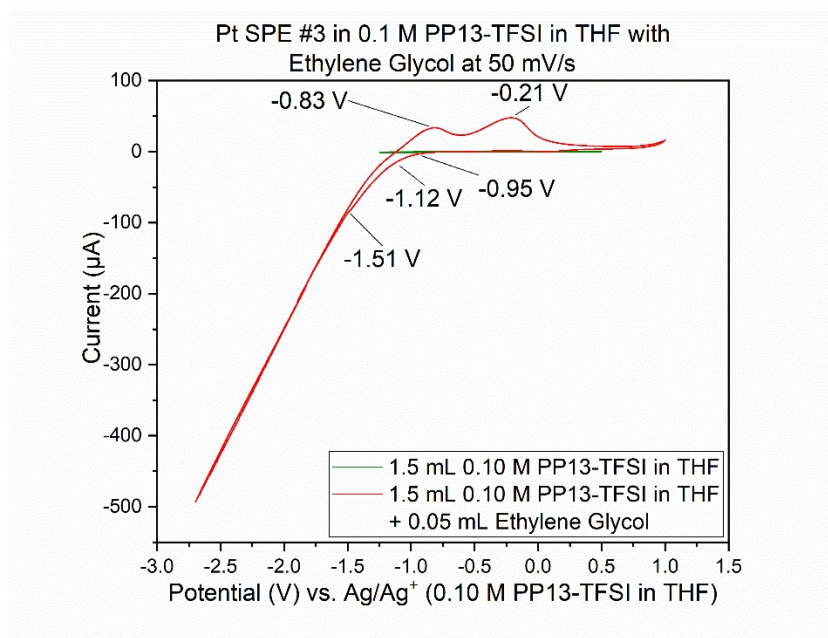

**Figure S17.** CV of 0.05 mL ethylene glycol added to 1.5 mL 0.1 M PP13-TFSI in THF cycled between -2.7 V to +1.0 V.

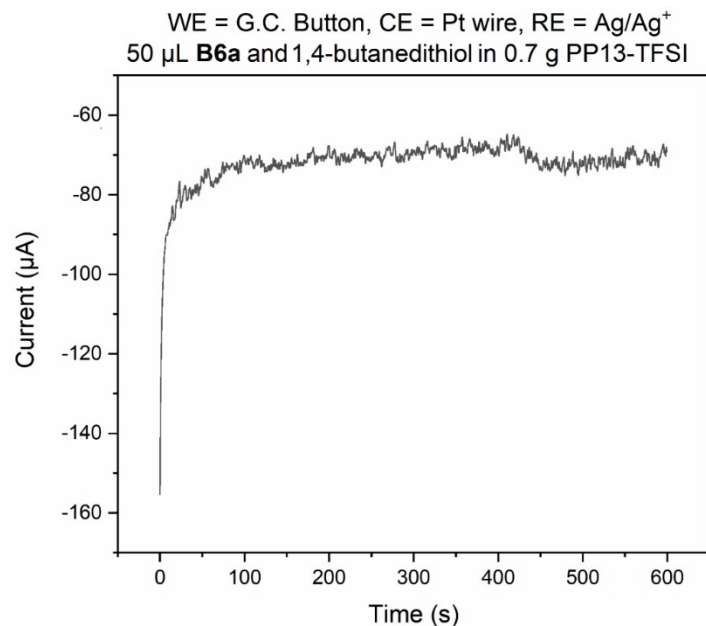

**Figure S18.** Chronoamperometric (CA) deposition attempt at -2.7 V for 600 seconds in a solution of 0.7g PP13-TFSI, 0.05 mL **B6a** and 0.05 mL 1,4-butanedithiol.

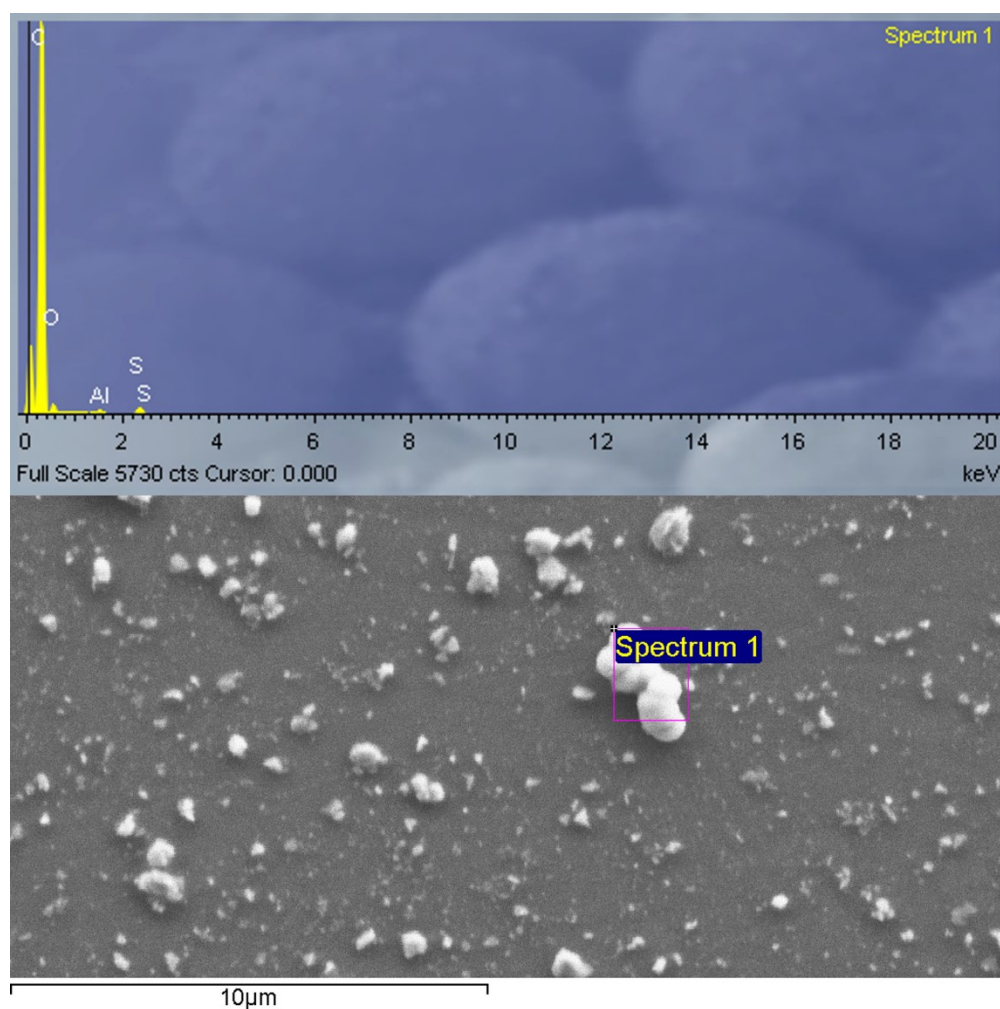

**Figure S19.** SEM-EDS analysis of a glassy carbon electrode following attempted chronoamperometric deposition of MoS<sub>2</sub>. Sulfur is present within the brightest globular structures observed.

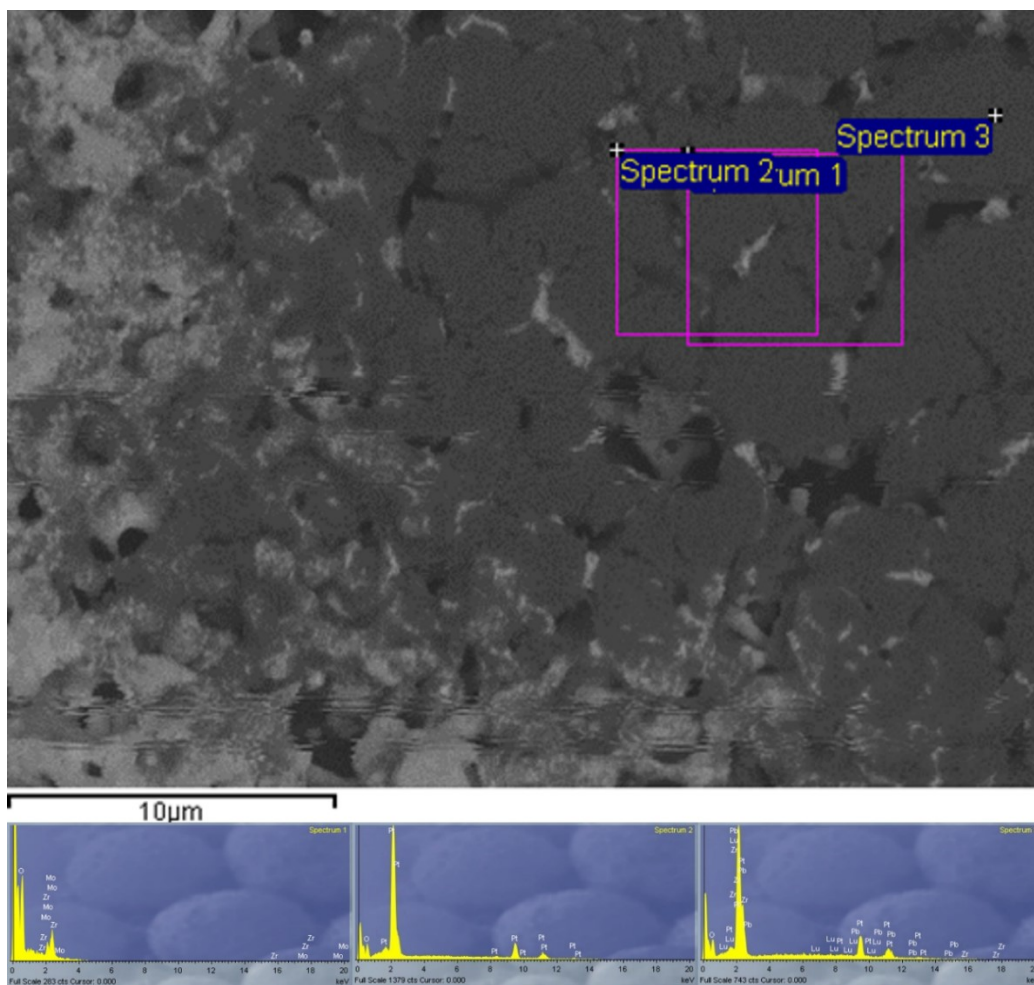

**Figure S20.** SEM-EDX analysis of Pt WE after CV of 0.05 mL **B6a** in 1.5 mL of 0.1 M PP13-TFSI in THF. Lu, Pb, and Zr are thought to be artifacts caused by Mo/Pt overlap.

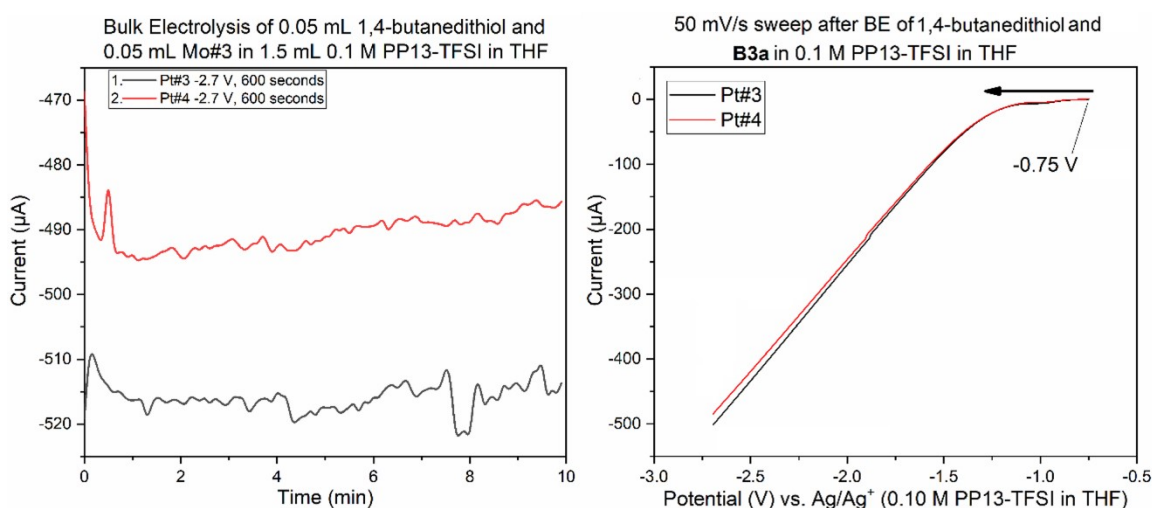

**Figure S21.** Two-step electrodeposition attempt involving a single solution of 1.5 mL of 0.1 M PP13-TFSI in THF which had 0.05 mL **B3a**, then 0.05 mL 1,4-butanedithiol added and left to sit for a week. The red solution was put into the electrochemical cell, and Pt SPE #3 followed by Pt SPE #4 had BE conducted at -2.7 V for 600 seconds (left) then by a single 50 mV/s sweep from -0.75 V to -2.7 V (right).

## References

1. Sakaebe, H.; Matsumoto, H. N-Methyl- N-propylpiperidinium bis(trifluoromethanesulfonyl)imide (PP13–TFSI) – novel electrolyte base for Li battery. *Electrochemistry Communications* **2003**, *5*, 594-598.
2. Dolomanov, O. V.; Bourhis, L. J.; Gildea, R. J.; Howard, J. A. K.; Puschmann, H. OLEX2: a complete structure solution, refinement and analysis program. *Journal of Applied Crystallography* **2009**, *42*, 339-341.
